# Supplementary material for: Wearable microfluidics: fabric-based digital droplet flowmetry for perspiration analysis
Source: Royal Society of Chemistry journal article supplement (doi:10.1039/c6lc01522k), 2017-01-01
Supplement: c6lc01522k1.pdf [file c6lc01522k1.pdf]

Supplementary Figures for

**Wearable Microfluidics: Fabric-based Digital Droplet Flowmetry for Perspiration Analysis**

Yahui Yang<sup>a</sup>, Siyuan Xing<sup>a</sup>, Zecong Fang<sup>a</sup>, Ruya Li<sup>ab</sup>, Helen Koo<sup>c</sup> and Tingrui Pan<sup>\*ab</sup>

<sup>a.</sup> *Micro-Nano Innovations (MiNI) Laboratory, Department of Biomedical Engineering, University of California, Davis, California, USA.*

<sup>b.</sup> *Department of Electrical and Computer Engineering, University of California, Davis, California, USA.*

<sup>c.</sup> *Department of Design, University of California, Davis, California, USA.*

\* Corresponding author, E-mail: [tingrui@ucdavis.edu](mailto:tingrui@ucdavis.edu)

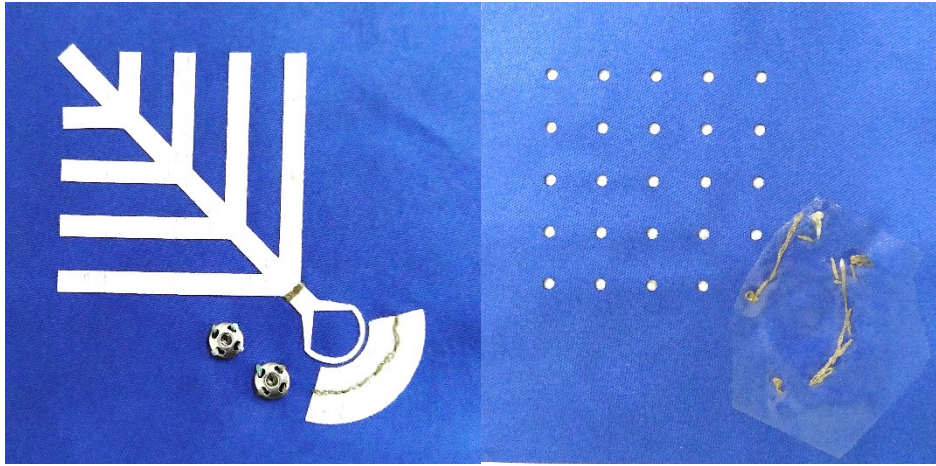

**Figure S1:** Illustration of both front and back side of a DDF device.

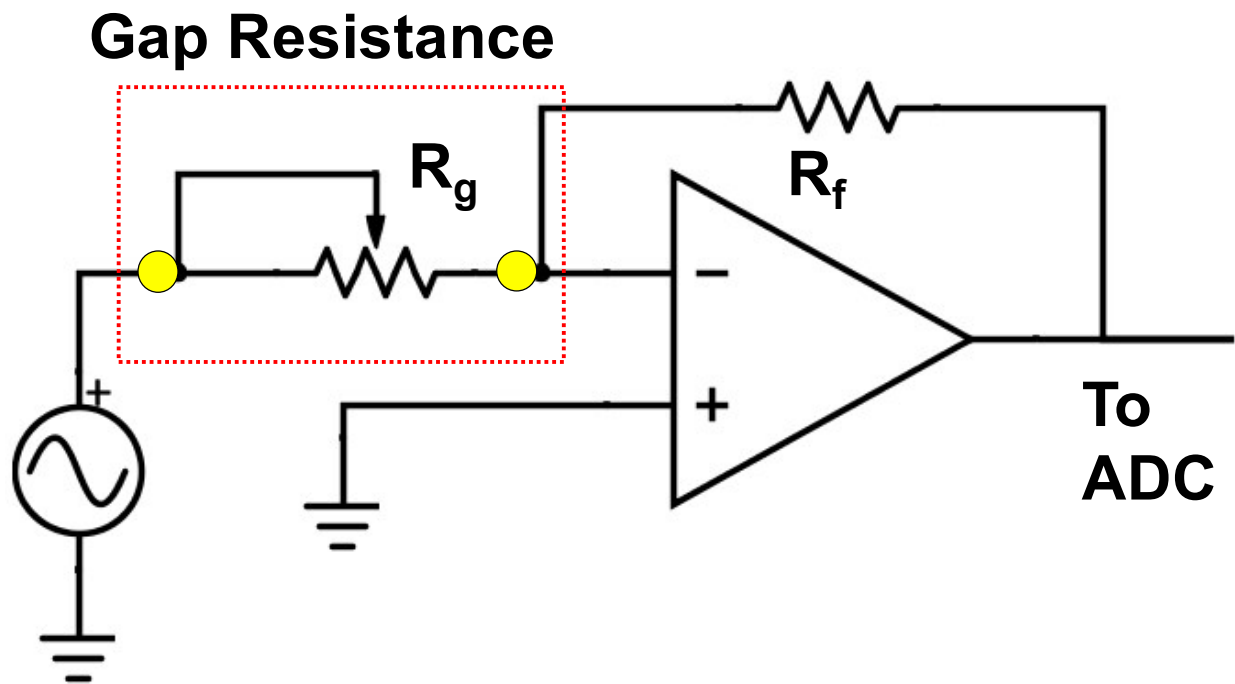

**Figure S2:** The schematic of the circuit used for droplet counting.

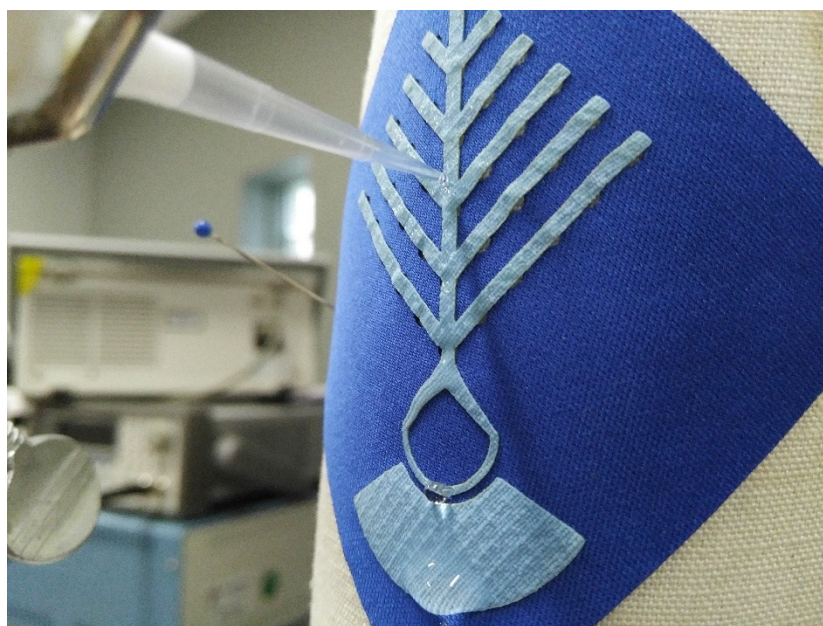

**Figure S3:** Photograph of the testing setup for a working fabric DDF device.
